# Supplementary material
Source: ML conference proceedings conference paper supplement (https://proceedings.mlr.press/v108/wang20e.html)
Supplement: Supplementary file [file wang20e-supp.pdf]

## A Proofs

**Lemma 1.** Let  $(\Omega, \mathcal{F})$  be a measurable space with a regular conditional probability property, and let  $X : \Omega \rightarrow \mathbb{R}^D$ ,  $Z : \Omega \rightarrow \mathbb{R}$  be  $\mathcal{F}$ -measurable random variables. Suppose  $P_j$  and  $P_k$  are  $\sigma$ -finite probability measures on  $(\Omega, \mathcal{F})$ , where  $P_j$  denotes the conditional probability measure of  $X$  given that  $Z = j$ , and  $P_k$  denote the same for  $Z = k$ , and  $P_j$  is absolutely continuous with respect to  $P_k$ . Let  $f : \mathbb{R}^D \times \mathbb{R} \rightarrow \mathbb{R}$  be defined as in Section 3, and  $f(x, z) \geq 0$  for all  $x \in \mathbb{R}^D$ ,  $z \in \mathbb{R}$ . If the function  $f$  satisfies monotonicity in the second argument such that  $f(x, j) \leq f(x, k)$  for all  $x \in \mathbb{R}^D$  and for  $j \leq k$ , and if the Radon Nikodym derivative  $\frac{dP_j}{dP_k}$  is bounded almost everywhere with respect to  $P_k$  by a finite constant  $C > 0$ , then

$$E[f(X, Z)|Z = j] \leq CE[f(X, Z)|Z = k]. \quad (4)$$

*Proof.* Under Lemma 1's assumptions,

$$\begin{aligned} E[f(X, Z)|Z = j] &= \int_{\mathbb{R}^D} f(x, j) dP_j \\ &\leq \int_{\mathbb{R}^D} f(x, k) dP_j \\ &= \int_{\mathbb{R}^D} f(x, k) \frac{dP_j}{dP_k} dP_k \\ &\leq C \int_{\mathbb{R}^D} f(x, k) dP_k \\ &= CE[f(X, Z)|Z = k]. \end{aligned}$$

The second inequality follows from monotonicity, and the third by the Radon Nikodym theorem since  $P_j \ll P_k$ .  $\square$

**Lemma 2.** Let  $f : \mathcal{X} \times \mathcal{Z} \rightarrow \mathbb{R}$ , where  $\mathcal{X} \subseteq \mathbb{R}^D$ ,  $\mathcal{Z} \subseteq \mathbb{R}$ . Assume that  $\mathcal{X}, \mathcal{Z}$  are both finite, with  $X \in \mathcal{X}$ ,  $Z \in \mathcal{Z}$ . Let  $\tilde{f}$  be the projection of  $f$  onto the set of functions over  $\mathcal{X} \times \mathcal{Z}$  that are monotonic with respect to  $Z$  such that for  $j \leq k$ ,  $f(x, j) \leq f(x, k)$ . For  $z_{(i)} \in \mathcal{Z}$ , let  $z_{(1)} \leq z_{(2)} \leq \dots \leq z_{(|\mathcal{Z}|)}$ . Define the average statistical parity violation:

$$R_f \triangleq \sum_{i=1}^{|\mathcal{Z}|} \frac{E[f(X, Z)|Z = z_{(i)}] - E[f(X, Z)|Z = z_{(i+1)}]}{|\mathcal{Z}|}$$

Then  $R_{\tilde{f}} \leq R_f$ .

*Proof.* Let  $\tilde{f} : \mathcal{X} \times \mathcal{Z} \rightarrow \mathbb{R}$  be the projection of  $f$  onto the class of functions monotonic in the second argument, defined as follows:

$$\begin{aligned} \tilde{f} &= \arg \min_{f'} \|f - f'\| \\ \text{s.t. } &f'(x, j) \leq f'(x, k) \quad \forall j, k \in \mathcal{Z}; j \leq k \end{aligned} \quad (5)$$

where

$$\|f - f'\|^2 = \sum_{x \in \mathcal{X}, z \in \mathcal{Z}} (f(x, z) - f'(x, z))^2.$$

The projection  $\tilde{f}$  can be computed in  $O(|\mathcal{X}||\mathcal{Z}|)$  time using the pool-adjacent-violators algorithm from isotonic regression (Ayer et al., 1955; JB, 1964), since a one dimensional projection can be done independently in  $O(|\mathcal{Z}|)$  time for each  $x \in \mathcal{X}$ .

$R_f$  is a telescoping sum:

$$R_f = \frac{E[f(X, Z)|Z = z_{(1)}] - E[f(X, Z)|Z = z_{(|\mathcal{Z}|)}]}{|\mathcal{Z}|}$$

For discrete  $X$  and  $Z$ , we have

$$E[f(X, Z)|Z = j] = \sum_{x \in \mathcal{X}} f(x, j) P(X = x|Z = j)$$

which implies

$$R_f = \frac{1}{|\mathcal{Z}|} \sum_{x \in \mathcal{X}} \left( f(x, z_{(1)}) P(X = x|Z = z_{(1)}) - f(x, z_{(|\mathcal{Z}|)}) P(X = x|Z = z_{(|\mathcal{Z}|)}) \right).$$

We now show that  $\tilde{f}(x, z_{(1)}) \leq f(x, z_{(1)})$ , and  $\tilde{f}(x, z_{(|\mathcal{Z}|)}) \geq f(x, z_{(|\mathcal{Z}|)})$ :

Suppose  $\tilde{f}(x, z_{(1)}) > f(x, z_{(1)})$ . Then we can set  $\tilde{f}'(x, z_{(1)}) = f(x, z_{(1)})$  without violating the monotonicity constraints, and  $\|\tilde{f} - \tilde{f}'\| < \|\tilde{f} - f\|$ , which contradicts that  $\tilde{f}$  solves (5). A similar argument can be made for  $z_{(|\mathcal{Z}|)}$ .

Since  $\tilde{f}(x, z_{(1)}) \leq f(x, z_{(1)})$  and  $\tilde{f}(x, z_{(|\mathcal{Z}|)}) \geq f(x, z_{(|\mathcal{Z}|)})$ , we have

$$\begin{aligned} &f(x, z_{(1)}) P(X = x|Z = z_{(1)}) \\ &\quad - f(x, z_{(|\mathcal{Z}|)}) P(X = x|Z = z_{(|\mathcal{Z}|)}) \\ &\geq \tilde{f}(x, z_{(1)}) P(X = x|Z = z_{(1)}) \\ &\quad - \tilde{f}(x, z_{(|\mathcal{Z}|)}) P(X = x|Z = z_{(|\mathcal{Z}|)}) \end{aligned}$$

Since the above inequality is true for all  $x$ , it holds for the sum over  $x \in \mathcal{X}$ , therefore  $R_{\tilde{f}} \leq R_f$ .  $\square$

**Lemma 3.** Suppose  $X$  is a continuous (or with a straightforward extension, discrete) random variable, and let  $\mathcal{S}$  be a nonempty set such that for all  $x \in \mathcal{S}$ , the joint probability density values  $p_{X, \hat{Y}|Z=z}(x, 1) > 0$  for  $z = j, k$ . Suppose we have monotonicity where  $f(x, j) \leq f(x, k)$  for  $j \leq k$  for all  $x \in \mathcal{S}$ . For a binary classifier this implies  $P(\hat{Y} = 1|X = x, Z = j) \leq$

$P(\hat{Y} = 1|X = x, Z = k)$ . Then we can bound one-sided statistical parity as follows:

$$\frac{P(\hat{Y} = 1|Z = j)}{P(\hat{Y} = 1|Z = k)} \leq \inf_{x \in \mathcal{S}} \frac{p_{X|Z=j}(x)p_{X|\hat{Y}=1, Z=k}(x)}{p_{X|Z=k}(x)p_{X|\hat{Y}=1, Z=j}(x)}$$

*Proof.* Fix  $x \in \mathcal{S}$ . By Bayes' theorem and monotonicity,

$$\begin{aligned} P(\hat{Y} = 1|Z = j) &= P(\hat{Y} = 1|X = x, Z = j) \frac{p_{X|Z=j}(x)}{p_{X|\hat{Y}=1, Z=j}(x)} \\ &\leq P(\hat{Y} = 1|X = x, Z = k) \frac{p_{X|Z=j}(x)}{p_{X|\hat{Y}=1, Z=j}(x)} \\ &= P(\hat{Y} = 1|Z = k) \frac{p_{X|\hat{Y}=1, Z=k}(x)}{p_{X|Z=k}(x)} \frac{p_{X|Z=j}(x)}{p_{X|\hat{Y}=1, Z=j}(x)} \end{aligned}$$

Since the inequality holds for all  $x \in \mathcal{S}$ , the tightest bound holds for the infimum.  $\square$

**Lemma 4.** Let  $Y \in \{0, 1\}$  be a random variable representing the target. Let  $\mathcal{S}$  be a nonempty set such that for all  $x \in \mathcal{S}$ , the following joint probability density values are non-zero for  $z = j, k$ :  $p_{X, Y, \hat{Y}|Z=z}(x, 1, 1) > 0$  and  $p_{X, Y|\hat{Y}=1, Z=z}(x, 1) > 0$ . Then,

$$\frac{P(\hat{Y} = 1|Y = 1, Z = j)}{P(\hat{Y} = 1|Y = 1, Z = k)} \leq \inf_{x \in \mathcal{S}} \frac{c_j(x)}{c_k(x)}$$

where  $c_z(x) = \frac{p_{X|Z=z}(x)P(Y = 1|\hat{Y} = 1, Z = z)}{p_{X|\hat{Y}=1, Z=z}(x)P(Y = 1|Z = z)}$

*Proof.* Let  $\mathcal{S}$  be a nonempty set such that for all  $x \in \mathcal{S}$ , the following joint probability density values are non-zero for  $z = j, k$ :

$$p_{X, Y, \hat{Y}|Z=z}(x, 1, 1) > 0 \text{ and } p_{X, Y|\hat{Y}=1, Z=z}(x, 1) > 0$$

Fix  $x \in \mathcal{S}$ .

Suppose we have a monotonic binary classifier, where  $P(\hat{Y} = 1|X = x, Z = j) \leq P(\hat{Y} = 1|X = x, Z = k)$  for  $j \leq k$ .

By Bayes' theorem, we have

$$\begin{aligned} &P(Y = 1|Z = j)P(\hat{Y} = 1|Y = 1, Z = j)p_{X|Y=1, \hat{Y}=1, Z=j}(x) \\ &= p_{X|Z=j}(x)P(\hat{Y} = 1|X = x, Z = j)P(Y = 1|X = x, \hat{Y} = 1, Z = j) \end{aligned}$$

$$\begin{aligned} &\text{and } p_{X|\hat{Y}=1, Z=j}(x)P(Y = 1|X = x, \hat{Y} = 1, Z = j) \\ &= p_{X|Y=1, \hat{Y}=1, Z=j}(x)P(Y = 1|\hat{Y} = 1, Z = j) \end{aligned}$$

Let  $c_z(x) = \frac{p_{X|Z=z}(x)P(Y=1|\hat{Y}=1, Z=z)}{p_{X|Y=1, Z=z}(x)P(Y=1|Z=z)}$ . This is well defined for  $x \in \mathcal{S}$ .

Combining both applications of Bayes' theorem and the monotonicity assumption:

$$\begin{aligned} &P(\hat{Y} = 1 | Y = 1, Z = j) \\ &= \frac{p_{X|Z=j}(x)P(Y = 1|X = x, \hat{Y} = 1, Z = j)}{P(Y = 1|Z = j)p_{X|Y=1, \hat{Y}=1, Z=j}(x)} \\ &\quad * P(\hat{Y} = 1|X = x, Z = j) \\ &= \frac{p_{X|Z=j}(x)P(Y = 1|\hat{Y} = 1, Z = j)}{P(Y = 1|Z = j)p_{X|\hat{Y}=1, Z=j}(x)} \\ &\quad * P(\hat{Y} = 1|X = x, Z = j) \\ &= c_j(x)P(\hat{Y} = 1|X = x, Z = j) \\ &\leq c_j(x)P(\hat{Y} = 1|X = x, Z = k) \\ &= \frac{c_j(x)}{c_k(x)}P(\hat{Y} = 1|Y = 1, Z = k) \end{aligned}$$

Since this holds for all  $x \in \mathcal{S}$ , it holds for the infimum.  $\square$

## B Counterexamples

To supplement Section 7, we give various counterexamples showing that certain relations between *statistical parity* and monotonicity do not hold.

### B.1 Monotonicity does not imply statistical parity.

We show that monotonic function  $f$  may violate *one-sided statistical parity* by an example that illustrates Simpson's paradox. Suppose  $X \in \{0, 1\}$ , where  $X = 1$  means a law student passed the bar and  $X = 0$  means the student did not. Let  $Z \in \{0, 1, 2, 3\}$  be the poverty level of the student, where  $Z = 3$  represents the highest poverty level. Suppose  $f(X, Z)$ , or the admissions score, is monotonic in  $Z$  and takes the values shown in Fig. 6. Suppose that the distributions  $P(X = x|Z = z)$  are given by figure 7. Then the maximum *one-sided statistical parity* violation is

$$\begin{aligned} &E[f(X, Z)|Z = 1] - E[f(X, Z)|Z = 2] \\ &= f(0, 1)P(X = 0|Z = 1) - f(0, 2)P(X = 0|Z = 2) \\ &\quad - f(1, 1)P(X = 1|Z = 1) + f(1, 2)P(X = 1|Z = 2) \\ &= 1.5(0.9) - 1.5(0.1) \\ &= 1.2. \end{aligned}$$

Thus, there is a positive one-sided statistical parity violation even though  $f(X, Z)$  is monotonic in  $Z$ . This violation comes from the fact that even though  $f(0, 1) \leq f(0, 2)$ , this is outweighed by the fact that  $P(X = 0|Z = 1) \geq P(X = 1|Z = 2)$ . This illustrates that for a monotonic function, the *statistical parity* violation depends on the conditional probabilities  $P(X = x|Z = z)$ , and indeed Lemma 1 bounds

the one-sided statistical parity violation by a ratio of conditional probabilities.

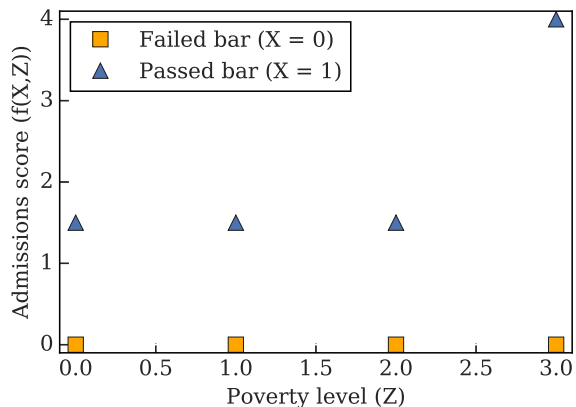

Figure 6: Monotonic admissions scores for Counterexamples B.1 and B.3.

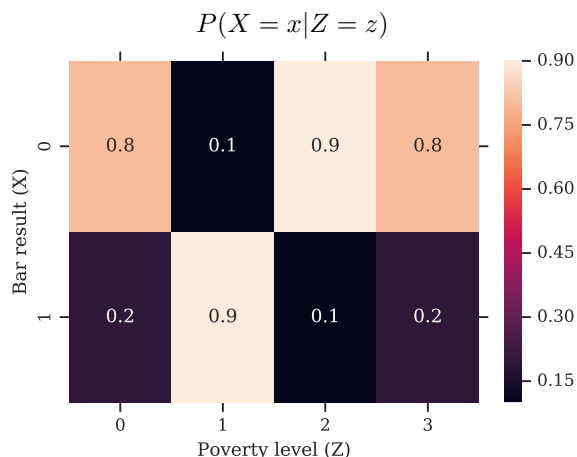

Figure 7: Distribution of  $X, Z$  for Counterexamples B.1 and B.3. The displayed values are  $P(X = x|Z = z)$  for  $X \in \{0, 1\}$  and  $Z \in \{0, 1, 2, 3\}$ .

### B.2 Statistical Parity does not imply a bound on monotonicity violations.

We show that the converse of Lemma 1 does not hold: a model that satisfies *statistical parity* may have arbitrarily high monotonicity violations regardless of the likelihood ratio  $C$ . Suppose the distribution of men and women for a given height  $x$  is equal for all heights, such that  $C = 1$ . Suppose that *statistical parity* is satisfied such that men and women were equally likely to be selected for a sports team on average. *Statistical parity* could hold if the model accepted all men over some height  $h$  that splits the population in half (say  $h = 5'8''$ ), and accepted all women under height  $h$ . But then for a height less than  $h$ ,  $P(\hat{Y} = 1|Z = \text{female}) = 0$

while  $P(\hat{Y} = 1|Z = \text{male}) = 1$ , and for height over  $h$ ,  $P(\hat{Y} = 1|Z = \text{male}) = 0$  while  $P(\hat{Y} = 1|G = \text{female}) = 1$ . Therefore, neither a positive nor a negative monotonicity constraint holds: there is no constant  $C' > 0$  such that  $P(\hat{Y} = 1|X = x, Z = \text{male}) \leq C'P(\hat{Y} = 1|X = x, Z = \text{female})$  or  $P(\hat{Y} = 1|X = x, Z = \text{female}) \geq C'P(\hat{Y} = 1|X = x, Z = \text{male})$  for all  $x$ .

### B.3 Monotonic projection can be more unfair in the worst case.

While Lemma 2 shows that projecting a function onto monotonicity constraints cannot increase the *average one-sided statistical parity* violation, it can increase violations *in the worst case*. Consider a continuation of the example from B.1, but this time let  $f(X, Z)$  be defined by Fig. 8, and let  $\tilde{f}(X, Z)$  be defined by Fig. 6. In this case, Fig. 6 is the monotonic projection of Fig. 8. Then the worst case *statistical parity* violation for the monotonic projection  $\tilde{f}$  is *higher* than the worst case *statistical parity* violation for the non-monotonic  $f$ :

$$\begin{aligned} E[\tilde{f}(X, Z)|Z = 1] - E[\tilde{f}(X, Z)|Z = 2] \\ = 1.5(0.9) - 1.5(0.9) \\ = 1.2 \end{aligned}$$

$$\begin{aligned} E[f(X, Z)|Z = 1] - E[f(X, Z)|Z = 2] \\ = 1.0(0.9) - 0.5(0.9) \\ = 0.85 \end{aligned}$$

For a given pair  $j, k$ , as long as  $\tilde{f}(x, j) \leq f(x, j)$  and  $\tilde{f}(x, k) \geq f(x, k)$ , then the violation

$$R_{\tilde{f}}(j, k) = E[f(X, Z)|Z = j] - E[f(X, Z)|Z = k]$$

will not be worse for the monotonic projection  $\tilde{f}$ :  $R_{\tilde{f}}(j, k) \leq R_f(j, k)$ . Lemma 2 holds because the inequalities  $\tilde{f}(x, j) \leq f(x, j)$  and  $\tilde{f}(x, k) \geq f(x, k)$  hold for  $j = z_{(1)}$  and  $k = z_{(|Z|)}$ , but this counterexample exists because those inequalities do not necessarily hold for any other pairs  $j, k$  in between.

## C Tradeoff between likelihood ratios in Lemma 3

The bound in Lemma 3 contains two likelihood ratios:  $\frac{p_{X|Z=j}(x)}{p_{X|Z=k}(x)}$  and  $\frac{p_{X|\hat{Y}=1, Z=k}(x)}{p_{X|\hat{Y}=1, Z=j}(x)}$ . When the first likelihood ratio is low, the second inverse likelihood ratio may be high. For example, suppose  $Z$  is an individual's poverty level ( $j$  being low poverty and  $k$  being high poverty),  $X$  is the number of extracurricular activities the individual

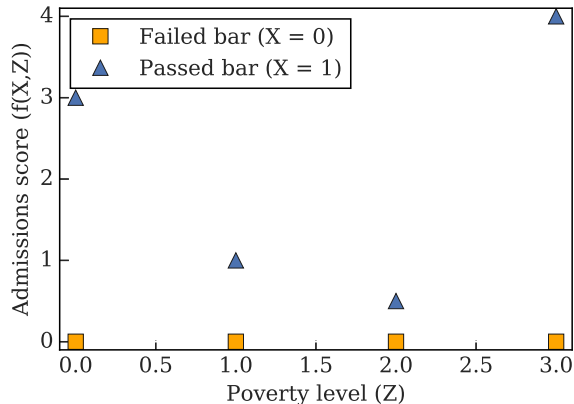

Figure 8: Nonmonotonic admissions scores for Counterexample B.3.

is involved in, and  $\hat{Y} = 1$  means the individual is accepted into university. Suppose all individuals with above a certain number of extracurricular activities is accepted. Then the first likelihood ratio could be low when the number of extracurricular activities  $X$  is low. Similarly, the likelihood that a high poverty individual accepted into university has a low number of extra curricular activities is probably also higher than the likelihood that a low poverty individual accepted into university has a low number of extracurricular activities. This implies that the second inverse likelihood ratio would be high, thus trading off with the first likelihood ratio.

### D Further Analysis of Law School Admissions Experiments

Figure 9 shows the distribution of the LSAT scores, undergraduate GPA, and bar exam outcomes. Examples where the bar exam outcome was missing were omitted in our experiments.

### E Further Analysis of Funding Proposals Experiments

Figure 10 gives a histogram of the four different poverty levels, which are ordinal with level 3 being the most impoverished.

Figure 11 (top) shows the training examples’ average number of exciting projects, where the error bars show the standard error of the mean. The poverty level feature ranges from 0 to 3, with 0 denoting low poverty and 3 denoting the highest poverty level. For ease of visualization, we show the quartiles of the students-reached feature.

Figure 11 (middle) shows the predicted probability

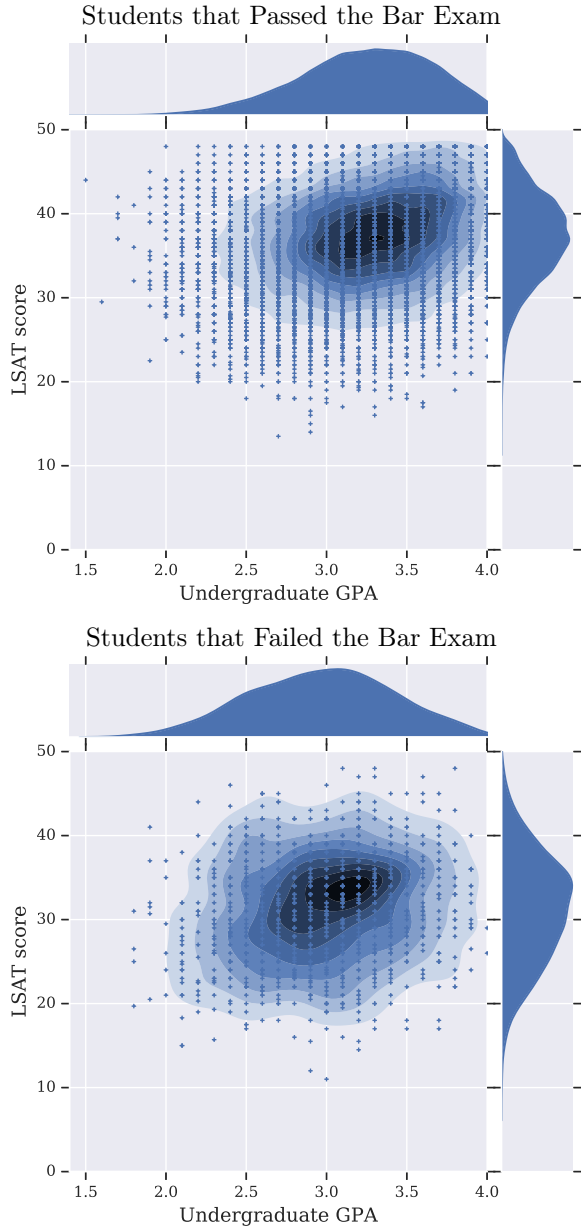

Figure 9: Distribution over the full Law School Admissions dataset of undergraduate GPA and LSAT score students for students that passed the bar exam (top) and students that failed the bar exam (bottom). The dataset consists of 94.86% students that passed the bar exam.

that a project is exciting for a GAM model without the proposed ethical constraints. The model gives lower scores to poverty level 2 (poorer schools) than to poverty level 1 (richer schools) for every quartile of students reached. The model also gives higher scores for project that reach 30-100 students tahn to projects that reach 100+ students.

Figure 11 (bottom) shows that training with an ethi-

cal monotonicity shape constraint works: at the same poverty level, projects that affect more students are given a higher score. For the same quartile of students reached, the score also does not decrease for higher poverty levels.

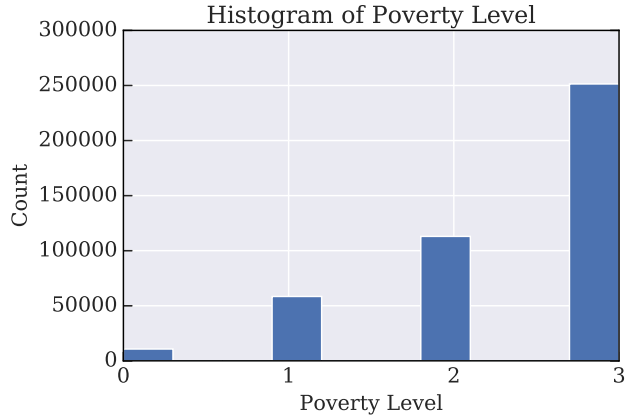

Figure 10: Histogram of the poverty level feature from the Funding Proposals dataset. 0 represents lowest poverty and 3 represents highest poverty.

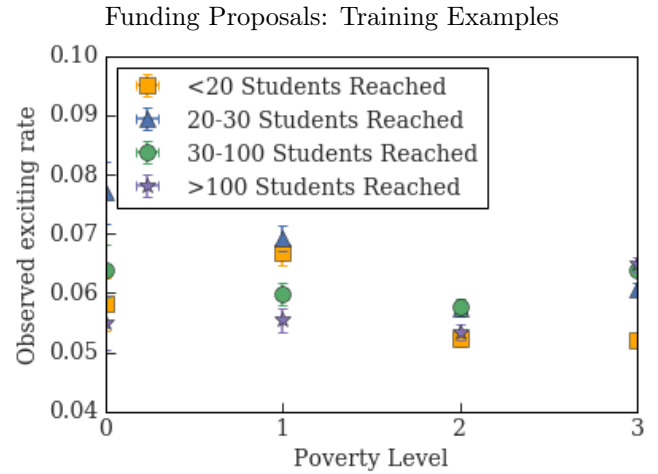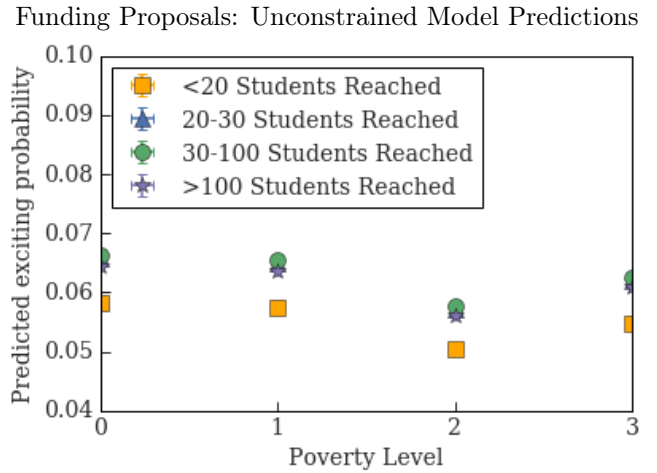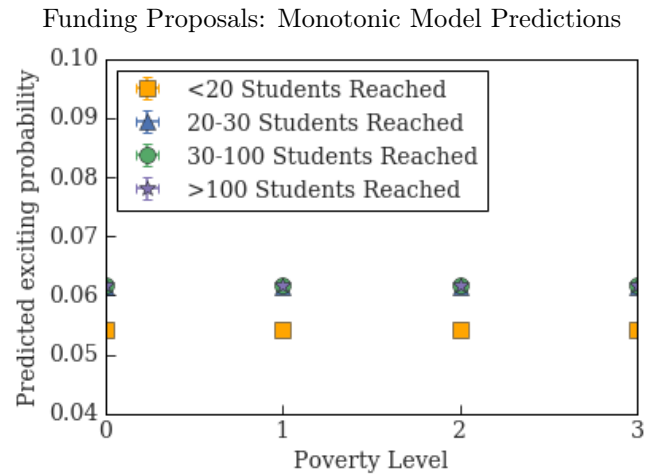

Figure 11: (top) Plot of the observed rate of exciting projects (mean number of exciting projects) as a function of each project’s poverty level and number of students reached. Error bars show the standard deviation. (middle) Unconstrained model predictions. (bottom) Shape-constrained model predictions.
